# Supplementary material for: Plasma Neurofilament Light Is Not Associated with Ongoing Neuroaxonal Injury or Cognitive Decline in Perinatally HIV Infected Adolescents: A Brief Report
Source: MDPI journal article supplement (doi:10.3390/v14040671), 2022-03-24
Supplement: s1 [file s1]

**Supplementary Table S1. Associations between pNfL and neuroimaging, cognitive and disease and treatment related variables**

|                                                         | plasma Neurofilament Light (pNfL) |                          |
|---------------------------------------------------------|-----------------------------------|--------------------------|
| Variables association analysis                          | Coefficient (95% CI)              | Adjusted <i>p</i> -value |
| <b>Neuroimaging</b>                                     |                                   |                          |
| White matter volume #                                   | 0.01 (-0.006 – 0.018)             | 0.351                    |
| Grey matter volume                                      | 0.001 (-0.008 – 0.011)            | 0.773                    |
| White matter hyperintensities #                         | -0.17 (-1.63 – 1.33)              | 0.828                    |
| Mean diffusivity #                                      | -0.002 (-0.012 – 0.007)           | 0.750                    |
| Axial diffusivity #                                     | -0.003 (-0.014 – 0.005)           | 0.455                    |
| Fractional anisotropy #                                 | -0.003 (-0.004 – 0.010)           | 0.395                    |
| Radial diffusivity #                                    | -2.40 (-7.01 – 2.13)              | 0.323                    |
| <b>Cognitive function</b>                               |                                   |                          |
| Executive function #                                    | 0.33 (-0.43 – 1.11)               | 0.412                    |
| Processing speed #                                      | -1.06 (-6.29 – 4.38)              | 0.698                    |
| Learning ability #                                      | 0.296 (-0.14 – 0.75)              | 0.200                    |
| Visual motor function                                   | 0.09 (-0.01 – 0.20)               | 0.091                    |
| Working memory #                                        | -0.32 (-1.36 – 0.73)              | 0.548                    |
| Intelligence quotient #                                 | 1.7 (-0.02 – 0.06)                | 0.143                    |
| <b>HIV- and cART related variables</b>                  |                                   |                          |
| CDC-C                                                   | -0.06 (-0.24 – 0.12)              | 0.536                    |
| Age at diagnosis                                        | 0.02 (-0.07 – 0.11)               | 0.676                    |
| Zenith HIV VL #                                         | 0.29 (-0.353 – 0.938)             | 0.599                    |
| Nadir CD4+ T-cell                                       | 0.06 (-0.33 – 0.46)               | 0.288                    |
| Duration of cART (y)                                    | 0.01 (-0.07 – 0.10)               | 0.823                    |
| Age at start cART (y)                                   | -0.04 (-0.08 – 0.07)              | 0.960                    |
| Undetectable HIV VL at second assessment                | 1.33 (-7.18 – 9.83)               | 0.780                    |
| Undetectable HIV VL between first and second assessment | 1.9 (-5.45 – 9.31)                | 0.631                    |

Linear mixed model formulas were used for longitudinal association analysis adjusted for age, sex and BMI; # These variables were transformed using natural logarithm prior to analysis. AIDS = acquired immunodeficiency syndrome; cART = combination antiretroviral therapy; CI = 95% confidence interval; CDC = Centers for Disease Control and Prevention, classification system used to classify HIV- stage (N = no symptoms, A = minimal symptoms, B = moderate symptoms, C = severely symptomatic/immunodeficiency syndrome); VL = viral load; y = year; Zenith VL values extracted for duration of follow-up and transformed using 10-base logarithm prior to analysis; CD4+ T-cell were compared to appropriate age and HIV- controls using Z-scores; Executive function and learning ability are compared to HIV- controls by Z-scores; HIV = human immunodeficiency virus; IQ and processing speed are compared with regular population; *p*-values were adjusted for age, sex, BMI;

**Supplementary Table S2. Different cART regimens at first and second assessment in PHIV adolescents**

| <b>cART Regimens</b>                                     | <b>PHIV (n = 19)</b> |
|----------------------------------------------------------|----------------------|
| Protease inhibitors (PIs)                                |                      |
| First assessment                                         | 7 (41%)              |
| Second assessment                                        | 4 (24%)              |
| Integrase strand transfer inhibitors (INSTIs)            |                      |
| First assessment                                         | 1 (6%)               |
| Second assessment                                        | 10 (58%)             |
| Non-nucleoside reverse transcriptase inhibitors (NNRTIs) |                      |
| First assessment                                         | 9 (53%)              |
| Second assessment                                        | 3 (18%)              |
| Efavirenz                                                |                      |
| First assessment                                         | 8 (47%)              |
| Second assessment                                        | 3 (18%)              |
| Ritonavir                                                |                      |
| First assessment                                         | 6 (35%)              |
| Second assessment                                        | 2 (11%)              |
| Abacavir                                                 |                      |
| First assessment                                         | 10 (58%)             |
| Second assessment                                        | 8 (47%)              |

Abbreviations: Values are reported in number and percentage (No %). PHIV (n = 19), with one missing value in first and second assessment; cART = Combination antiretroviral therapy; INSTIs = integrase strand transfer inhibitors; PIs = protease inhibitors; NNRTIs = non-nucleoside reverse transcriptase inhibitors;

**Supplementary Table S3. Different cART regimens and association with pNfL and cognitive function variables over time**

| Association analysis of different cART regimens |                     |                      |                     |                    |                     |                     |
|-------------------------------------------------|---------------------|----------------------|---------------------|--------------------|---------------------|---------------------|
|                                                 | PIs exposure        | INSTIs exposure      | NNRTIs exposure     | Efavirenz exposure | Ritonavir exposure  | Abacavir exposure   |
|                                                 | Group x time        | Group x time         | Group x time        | Group x time       | Group x time        | Group x time        |
| <b>Executive function <sup>#</sup></b>          |                     |                      |                     |                    |                     |                     |
| Coefficient (95% CI)                            | -0.3 (-1.1 – 0.5)   | 0.5 (-0.2 – 1.9)     | 0.6 (-0.2 – 1.3)    | 0.6 (-0.1 – 1.3)   | -0.5 (-1.3 – 0.4)   | 0.3 (-0.7 – 1.3)    |
| <i>p</i> -value                                 | 0.418               | 0.174                | 0.113               | 0.116              | 0.244               | 0.525               |
| <b>Processing speed <sup>#</sup></b>            |                     |                      |                     |                    |                     |                     |
| Coefficient (95% CI)                            | 0.09 (-0.01 – 0.2)  | -0.07 (-0.1 – 0.005) | 0.01 (-0.06 – 0.09) | 0.03 (-0.05 – 0.1) | 0.03 (-0.06 – 0.12) | -0.04 (-0.1 – 0.03) |
| <i>p</i> -value                                 | 0.075               | 0.086                | 0.743               | 0.424              | 0.533               | 0.246               |
| <b>Learning ability <sup>#</sup></b>            |                     |                      |                     |                    |                     |                     |
| Coefficient (95% CI)                            | -0.1 (-0.9 – 0.7)   | -0.3 (-0.7 – 0.5)    | -0.4 (-1.0 – 0.3)   | -0.2 (-0.9 – 0.5)  | 0.7 (-0.2 – 1.4)    | -0.1 (-0.7 – 0.5)   |
| <i>p</i> -value                                 | 0.789               | 0.489                | 0.222               | 0.547              | 0.093               | 0.706               |
| <b>Visual motor function <sup>#</sup></b>       |                     |                      |                     |                    |                     |                     |
| Coefficient (95% CI)                            | -0.13 (-0.08 – 0.3) | -0.15 (-0.3 – 0.04)  | 0.04 (-0.2 – 0.2)   | 0.09 (-0.1 – 0.3)  | 0.08 (-0.2 – 0.3)   | -0.08 (-0.3 – 0.09) |
| <i>p</i> -value                                 | 0.256               | 0.135                | 0.647               | 0.392              | 0.513               | 0.391               |
| <b>Working memory <sup>#</sup></b>              |                     |                      |                     |                    |                     |                     |
| Coefficient (95% CI)                            | -0.001 (-0.3 – 0.3) | -0.09 (-0.4 – 0.19)  | 0.09 (-0.2 – 0.4)   | 0.1 (-0.2 – 0.4)   | -0.03 (-0.03 – 0.4) | 0.05 (-0.2 – 0.3)   |
| <i>p</i> -value                                 | 0.994               | 0.556                | 0.523               | 0.525              | 0.849               | 0.695               |
| <b>Intelligence Quotient</b>                    |                     |                      |                     |                    |                     |                     |
| Coefficient (95% CI)                            | -0.5 (-9.0 – 7.8)   | -0.8 (-7.8 – 6.7)    | 1.1 (-6.0 – 8.3)    | 3.0 (-4.3 – 10.2)  | -5.2 (-13.5 – 3.1)  | 2.8 (-2.6 – 8.5)    |
| <i>p</i> -value                                 | 0.911               | 0.834                | 0.762               | 0.428              | 0.240               | 0.332               |
| <b>pNfL (log pg/ml) <sup>#</sup></b>            |                     |                      |                     |                    |                     |                     |
| Coefficient (95% CI)                            | 0.17 (-0.3 – 0.7)   | 0.09 (-0.5 – 0.6)    | -0.3 (-0.7 – 0.3)   | -0.2 (-0.7 – 0.3)  | 0.4 (-0.2 – 0.9)    | 0.03 (-0.4 – 0.04)  |
| <i>p</i> -value                                 | 0.520               | 0.755                | 0.347               | 0.427              | 0.254               | 0.910               |

Abbreviations: pNfL = plasma Neurofilament light; 95% CI = 95% Confidence Interval; Group x time = group by time interaction; INSTIs = integrase strand transfer inhibitors; PIs = protease inhibitors; NNRTIs = non-nucleoside reverse transcriptase inhibitors; Executive function and learning ability are compared to HIV- controls by Z-scores; Visual motor function, working memory, IQ and processing speed are compared with regular population; CD4+ T-cell were compared to appropriate age and HIV- controls using Z-scores. Linear mixed models' formulas were used for longitudinal association analysis. # These variables were transformed using natural logarithm prior to analysis.
